# Supplementary material
Source: PubMed Central journal article supplement (PMC4076034)
Supplement: cb4008875_si_001.pdf [file cb4008875_si_001.pdf]

**Structures of Darunavir-Resistant HIV-1 Protease Mutant Reveal  
Atypical Binding of Darunavir to Wide Open Flaps**

**Ying Zhang<sup>1</sup>, Yu-Chung E. Chang<sup>1,2</sup>, John M. Louis<sup>3</sup>, Yuan-Fang Wang<sup>4</sup>, Robert  
W. Harrison<sup>5,1</sup>, Irene T. Weber<sup>1,4</sup>**

<sup>1</sup>Department of Chemistry, <sup>4</sup>Department of Biology, <sup>5</sup>Department of Computer Science, Georgia State University, Atlanta, GA, 30303.

<sup>3</sup>Laboratory of Chemical Physics, National Institute of Diabetes and Digestive and Kidney Diseases, National Institutes of Health, DHHS, Bethesda, Maryland 20892-0520, United States

<sup>2</sup>Current address: Department of Developmental Therapeutics, Fox Chase Cancer Center, Philadelphia, PA, 19111.

**Table S1. Crystallographic Data Collection and Refinement Statistics**

|                                                                  |                                  |                        |
|------------------------------------------------------------------|----------------------------------|------------------------|
| Complex name                                                     | PR <sub>P51-D25N</sub> /DRV      | PR <sub>P51-D25N</sub> |
| Wavelength (Å)                                                   | 1.0                              | 1.0                    |
| Space group                                                      | P4 <sub>1</sub> 2 <sub>1</sub> 2 | P4 <sub>1</sub>        |
| Unit cell dimensions (Å)                                         |                                  |                        |
| a = b                                                            | 46.80                            | 46.69                  |
| c                                                                | 100.63                           | 101.62                 |
| $\alpha = \beta = \gamma$                                        | 90°                              | 90°                    |
| Unique reflections                                               | 13867                            | 34414                  |
| Redundancy <sup>§</sup>                                          | 8.3 (4.6)                        | 8.0 (3.4)              |
| R <sub>merge</sub> (%) overall <sup>§</sup>                      | 8.1% (42.2%)                     | 6.7% (27.7%)           |
| $\langle I/\sigma \rangle$ overall <sup>§</sup>                  | 18.5 (3.3)                       | 23.2 (4.6)             |
| Completeness (%) overall <sup>§</sup>                            | 99.4% (98.3%)                    | 99.4% (95.5%)          |
| Refinement resolution range                                      | 22.16-1.66                       | 23.64-1.50             |
| R <sub>work</sub>                                                | 18.9%                            | 15.9%                  |
| R <sub>free</sub>                                                | 22.6%                            | 19.7%                  |
| No. of water molecules atoms<br>(total occupancies) <sup>¶</sup> | 48<br>(45.5)                     | 144<br>(119.5)         |
| RMSD from ideality                                               |                                  |                        |
| Bonds (Å)                                                        | 0.021                            | 0.023                  |
| Angle distance (degrees)                                         | 2.326                            | 2.070                  |
| Average B-factors (Å <sup>2</sup> )                              |                                  |                        |
| Main chain atoms                                                 | 26.33                            | 23.17                  |
| Side chain atoms                                                 | 31.10                            | 27.88                  |
| Ligand                                                           | 33.10                            | -                      |
| Solvent                                                          | 35.35                            | 32.43                  |

<sup>§</sup>Values in parentheses are given for the highest resolution shell

<sup>¶</sup>Values in parentheses are given for total occupancies

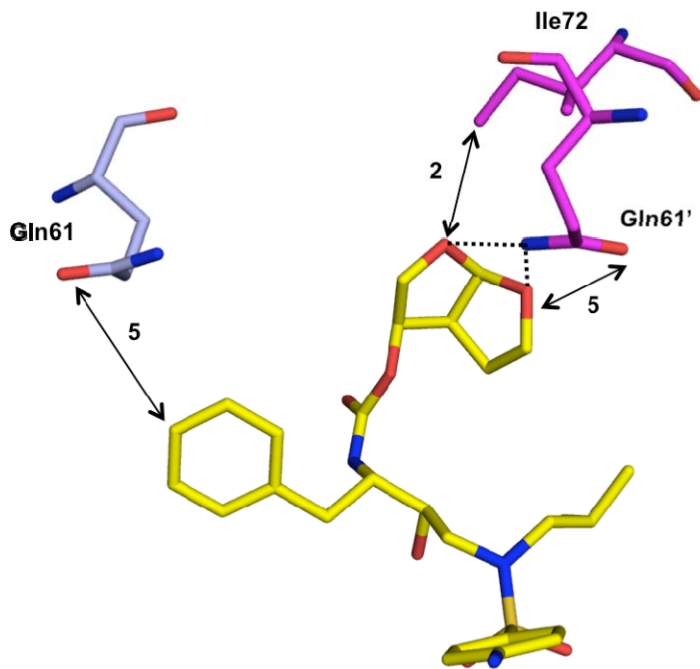

**Figure S1.** DRV interactions with symmetry-related monomer of PR<sub>P51-D25N</sub>. The dotted lines show the hydrogen bond interactions and the double-sided arrows represent the van der Waals contacts. The numbers of van der Waals contacts are indicated.

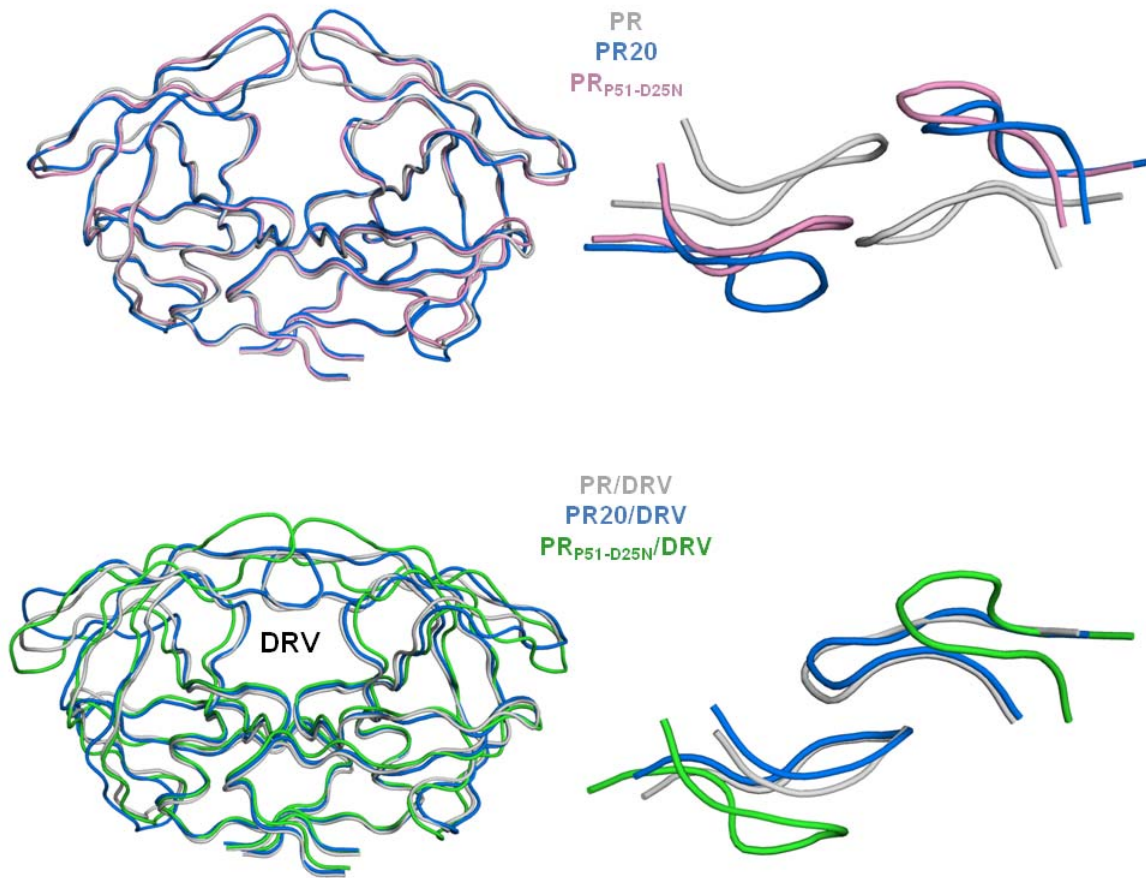

**Figure S2.** Comparison of PR<sub>P51-D25N</sub>, PR20 and wild-type PR structures. (A) Superposition of ligand-free PR (PDB ID: 1HHP) (grey), PR20 (PDB ID: 3UF3) (blue) and PR<sub>P51-D25N</sub> (pink) in ribbon representation with perpendicular view of flap residues 46-54. (B) Superposition of PR/DRV (PDB ID: 2IEN) (grey), PR20/DRV (PDB ID: 3UCB) (blue) and PR<sub>P51-D25N</sub>/DRV (green) in ribbon representation and perpendicular view of residues 46-54. DRV is omitted for clarity.
